# Supplementary material for: Cynomolgus Macaque as an Animal Model for Severe Acute Respiratory Syndrome
Source: PLOS journal article supplement (doi:10.1371/journal.pmed.0030149), 2006-04-10
Supplement: S1 (10.1371/journal.pmed.0030149.s001) [file journal.pmed.0030149.s001]

Figure S1 A

Figure S1 B

Figure S1 C

Figure S1 D

Figure S1 E

Figure S1 F

Figure S1 G

Figure S1 H

Figure S1 I

Figure S1 J

Figure S1 K

Figure S1 L

Figure S1 M

Figure S1 N

Figure S1 O
